# Supplementary material for: Investigating the complexation propensity of self-assembling dipeptides with the anticancer peptide-drug Bortezomib: a computational study
Source: Royal Society of Chemistry journal article supplement (doi:10.1039/d3sm00930k), 2023-01-01
Supplement: d3sm00930k1.pdf [file d3sm00930k1.pdf]

# Supporting Information

## Investigating the Complexation Propensity of Self-Assembling Dipeptides with the Anticancer Peptide-Drug Bortezomib: A Computational Study

Peter Divanach<sup>1,2</sup>, Eirini Fanouraki<sup>1,2</sup>, Anna Mitraki<sup>1,2\*</sup>,

Vagelis Harmandaris<sup>3,4,5</sup>, Anastassia N. Rissanou<sup>3,5,6,\*</sup>

1. Department of Materials Science and Technology, University of Crete, Voutes Campus Greece.
2. Institute of Electronic Structure and Laser / Foundation for Research and Technology-Hellas, (FORTH), Nikolaou Plastira 100, Vassilika Vouton, Heraklion, Crete, Greece
3. Institute of Applied and Computational Mathematics (IACM), Foundation for Research and Technology Hellas, (FORTH), IACM/FORTH, GR-71110 Heraklion, Crete, Greece.
4. Department of Mathematics and Applied Mathematics, University of Crete, GR-71409, Heraklion, Crete, Greece.
5. Computation-based Science and Technology Research Center; The Cyprus Institute, Nicosia 2121, Cyprus.
6. Natl Hellen Res Fdn, Theoret & Phys Chem Inst, 48 Vassileos Constantinou Ave, Athens 11635, Greece.

**Keywords:** dipeptides; Bortezomib; self-assembly; association; molecular dynamics

26 **Experimental materials and methods**

27 The Bortezomib peptide was purchased from Merck in form of lyophilized powder with purity  
28 greater than 95 %. The water solvent used was nanopure purified, filtered and sterilized. Sample  
29 solutions were prepared by dissolving the Bortezomib powder into water at room temperature  
30 following sonication at c=4 mg/ml. Different concentrations were tested as well as briefly heating  
31 Bortezomib up to 55 °C, for a couple of seconds, to facilitate dissolution.

32 For FESEM observation, a sample of 10 µL placed in a slide to be dried. After the samples were  
33 dried, sputtering was carried out as follows: The samples were placed on a slide with the help of  
34 conductive carbon adhesive tape. The slide was subsequently placed on a gold sputtering machine  
35 and a 15 nm thick gold (Au) layer was deposited for 64 sec at 40 mA. For the observation of the  
36 samples FESEM JEOL 7000 field emission scanning electron microscope was used, operating at  
37 15 kV.

38

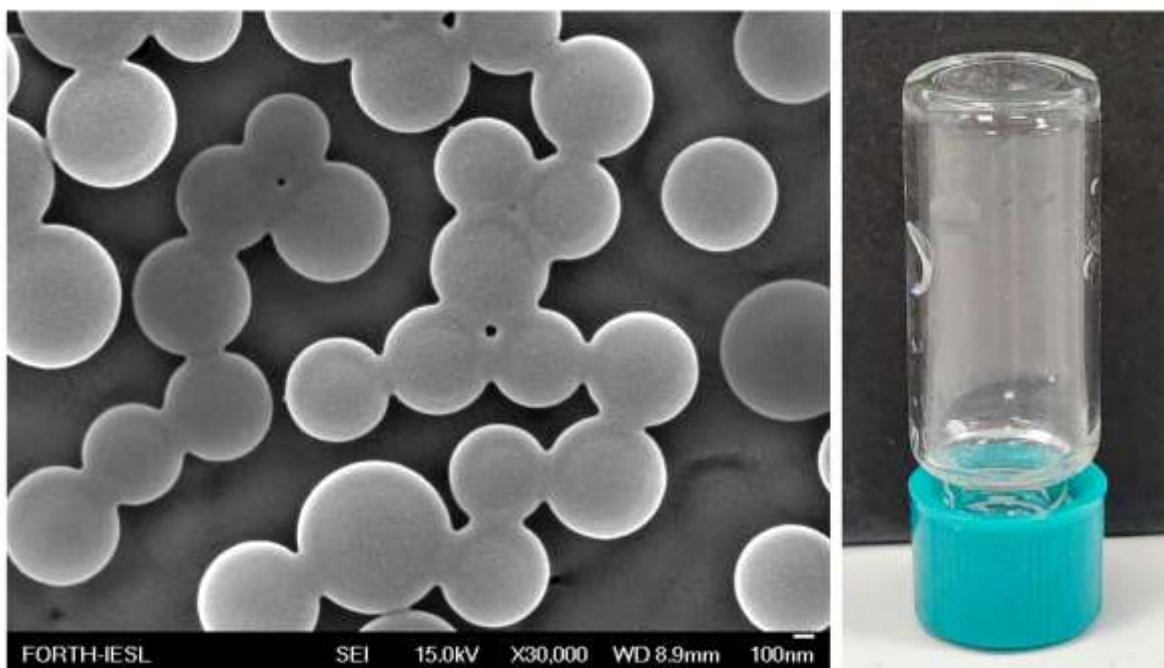

39

40 **Figure SI-1:** FESEM pictures of bortezomib spheres, following H<sub>2</sub>O evaporation after 24h  
41 incubation at room temperature, at a concentration of 4 mg/ml, along with an inverted vial showing  
42 that the solution flows to the bottom and does not form a self-supporting gel.

43

44

45 In the case of Cyclo-LF, Z-FF and Fmoc-FF with and without Bortezomib the two-solvent  
46 ethanol/water (3:7) approach was used. Following ethanol addition, the mixture was vortexed and  
47 placed in a water bath thermostat with a temperature of  $T=50\text{ }^{\circ}\text{C}$ . Sonication was performed for 4  
48 seconds with 20 seconds intervals for 15 minutes until complete dissolution was achieved, after  
49 which water addition took place to induce self-assembly. When mixed with Bortezomib, it was  
50 done in a 1:1 peptide/BTZ ratio. The final concentration in all cases was  $c=4\text{ mg/ml}$ , although  
51 lower concentrations were also tested. The above was also tested with Bortezomib's addition  
52 without heating, without observing discernible alterations in the resultant self-assembled  
53 structures. Bortezomib on its own was also examined in the EtOH/H<sub>2</sub>O 3:7 system, at  $c=4\text{mg/ml}$ ,  
54 without any apparent deviation in the spherical conformations it adopted.

55 For field emission scanning electron microscopy (FESEM) observations, once more, 10  $\mu\text{L}$  of the  
56 sample was placed on a glass slide and allowed to dry. Subsequently, sputtering was conducted as  
57 follows: The samples were affixed to the slide using conductive carbon adhesive tape and  
58 subjected to a gold sputtering procedure, depositing a 15 nm thick gold (Au) layer for 64 seconds  
59 at 40 mA. FESEM analysis was performed using a JEOL 7000 field emission scanning electron  
60 microscope, operating at 15 kV, to examine the structural characteristics of the samples.

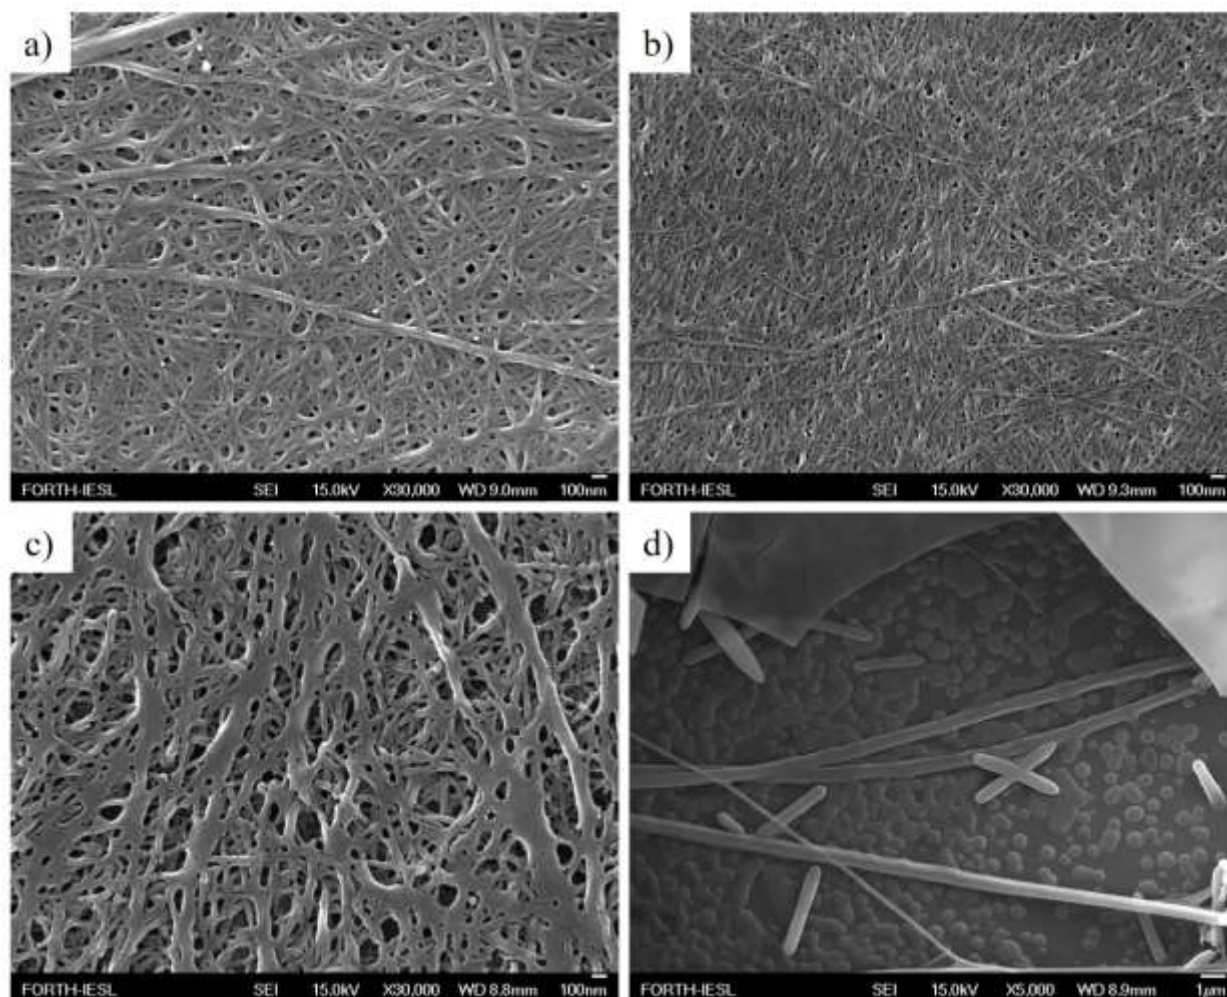

61  
 62 **Figure SI-2:** FESEM images peptides in (EtOH/H<sub>2</sub>O 3:7) with BTZ at a 1:1 ratio at a concentration  
 63 of  $c = 4$  mg/ml after 24h at room temperature. Scale bars are 1  $\mu$ m. a) Z-FF with BTZ b) Fmoc-FF  
 64 with BTZ c) Cyclo-LF with BTZ and d) LF with BTZ.

65  
 66 As depicted in the Field Emission Scanning Electron Microscopy (FESEM) images, it is evident that all  
 67 examined peptides, with the exception of LF (Figure SI-2d), exhibit the capacity to yield hydrogels, even  
 68 upon the introduction of BTZ (Bortezomib). Among these, Fmoc-FF demonstrates the highest degree of  
 69 hydrogel stability in the presence of BTZ (Figure SI-2b), forming intricate and densely interwoven fibril  
 70 networks. Z-FF, in conjunction with BTZ (Figure SI-2a), constitutes the second most robust hydrogel,  
 71 characterized by substantial fibril networks. In contrast, CycloLF exhibits the lowest hydrogel stability in  
 72 the presence of BTZ (Figure SI-2c) among the three peptides, and a notably slower rate of hydrogel  
 73 formation.

75

76

77

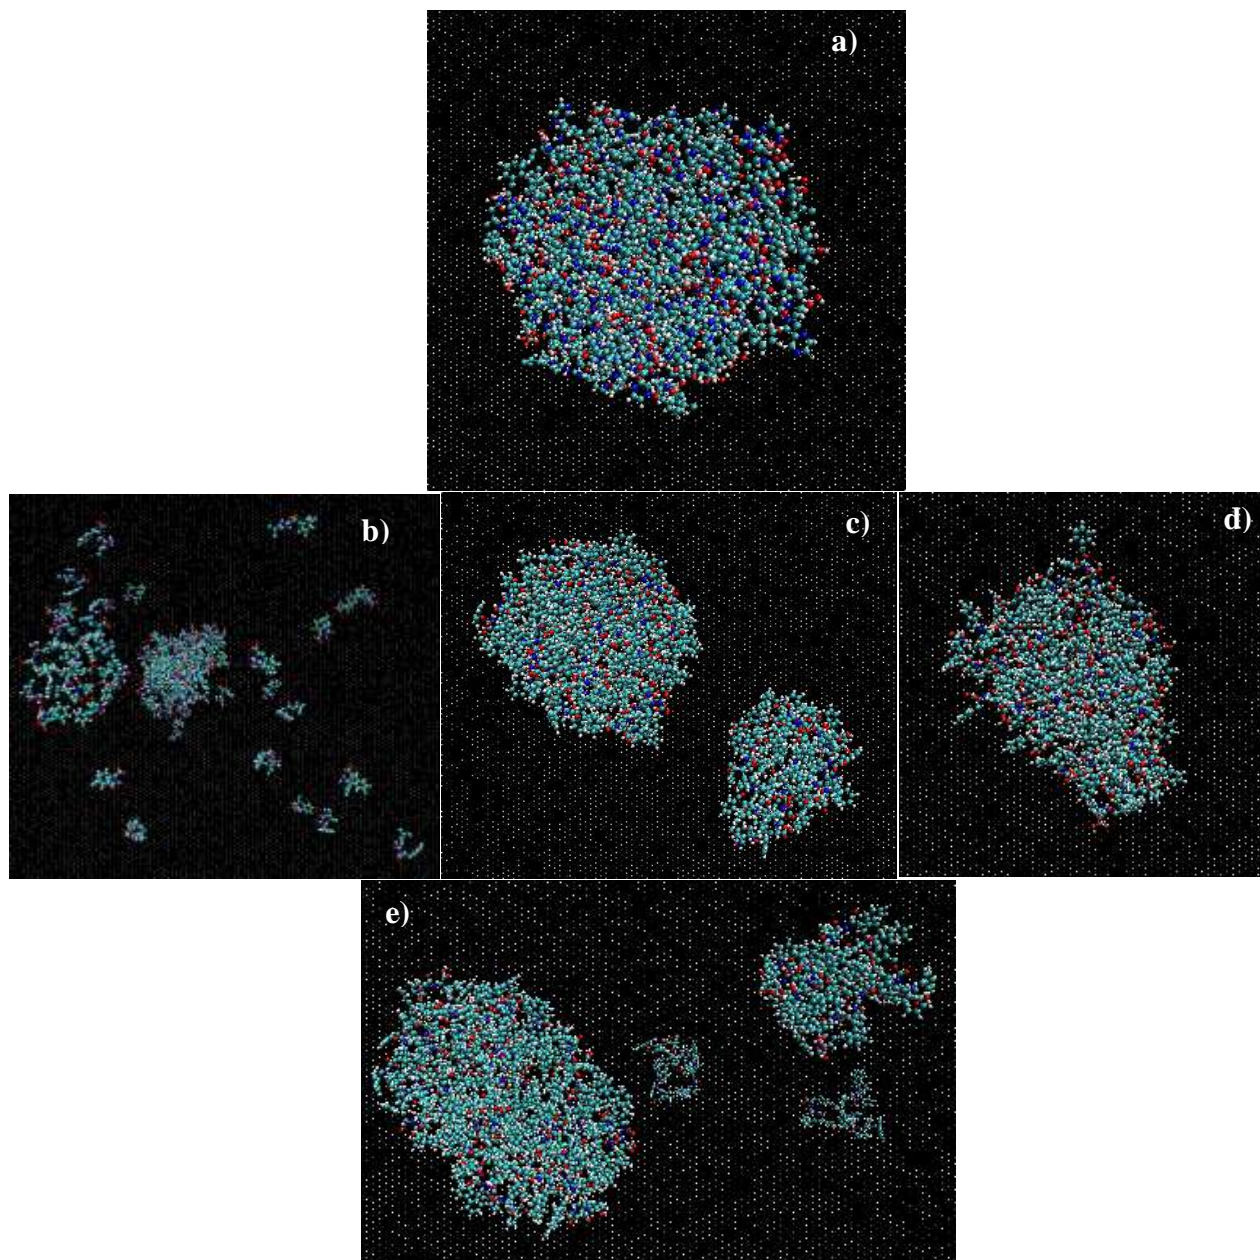

78

79

80

81

82 **Figure SI-3:** Characteristic snapshots of clusters (a) BTZ; (b) LF; (c) z-FF; (d) Cyclo-FF; (e)  
83 Fmoc-FF. Water molecules are presented as ghost for clarity.

84

85

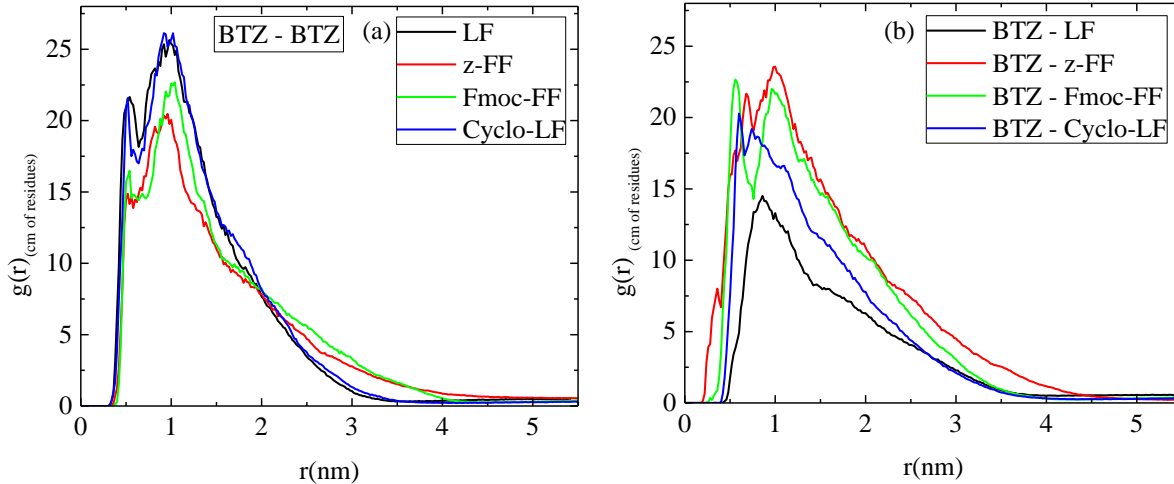

86

87

88 **Figure SI-4:** Pair radial distribution functions between (a) Bortezomib molecules and (b)  
89 Bortezomib-dipeptide calculated for the cm of molecules in the aqueous solutions at T=300K.

90

91 **Table SI-1:** Average number of hydrogen bonds between the three groups of hydrogen bonding  
92 active sites of BTZ and dipeptide molecules.

93

| Systems         | (OH-DIPEP.)/BTZ | (NH-DIPEP.)/BTZ | (CO-DIPEP.)/BTZ |
|-----------------|-----------------|-----------------|-----------------|
| <b>LF</b>       | 0.08±0.05       | 0.02±0.01       | 0.06±0.03       |
| <b>Cyclo-LF</b> | 0.12±0.01       | 0.29±0.01       | 0.15±0.01       |
| <b>Fmoc-FF</b>  | 0.17±0.06       | 0.35±0.06       | 0.14±0.05       |
| <b>Z-FF</b>     | 0.16±0.05       | 0.33±0.06       | 0.27±0.05       |

94

95

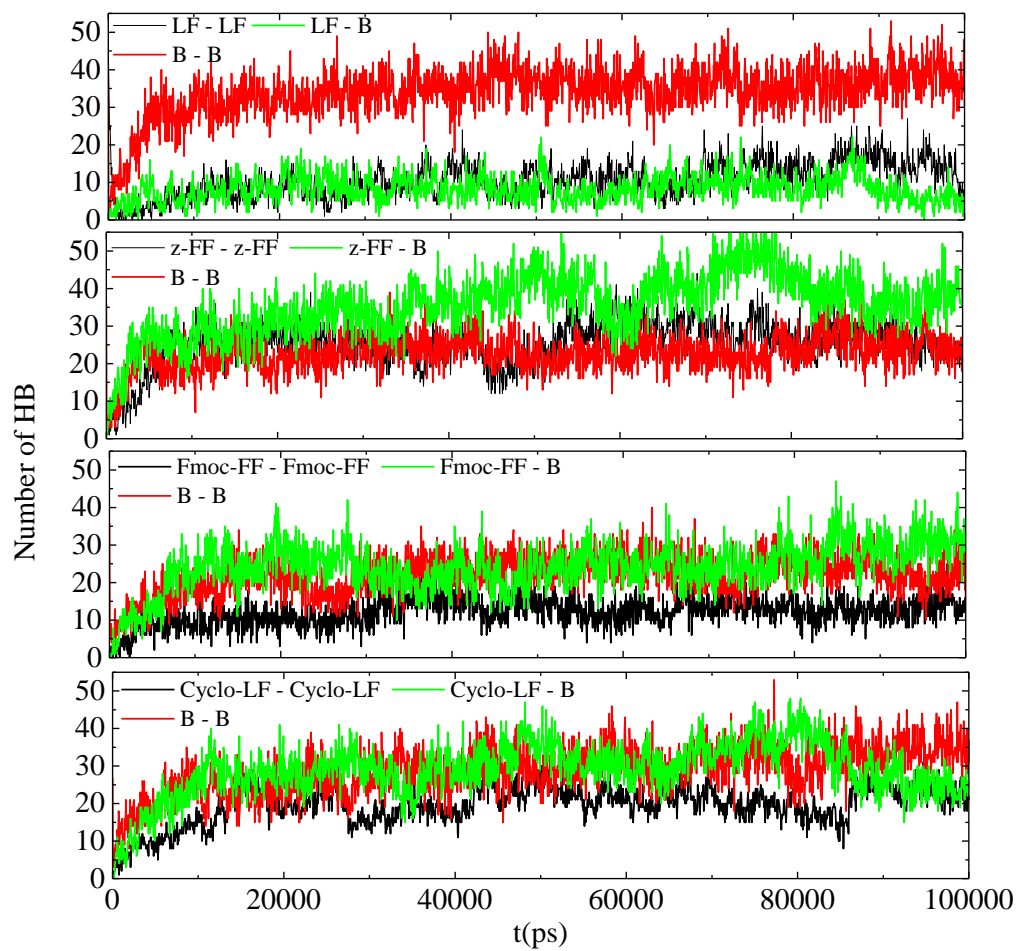

96

97 **Figure SI-5:** Hydrogen bonds, between the BTZ and dipeptide molecules, as a function of time.

98

99

100

101

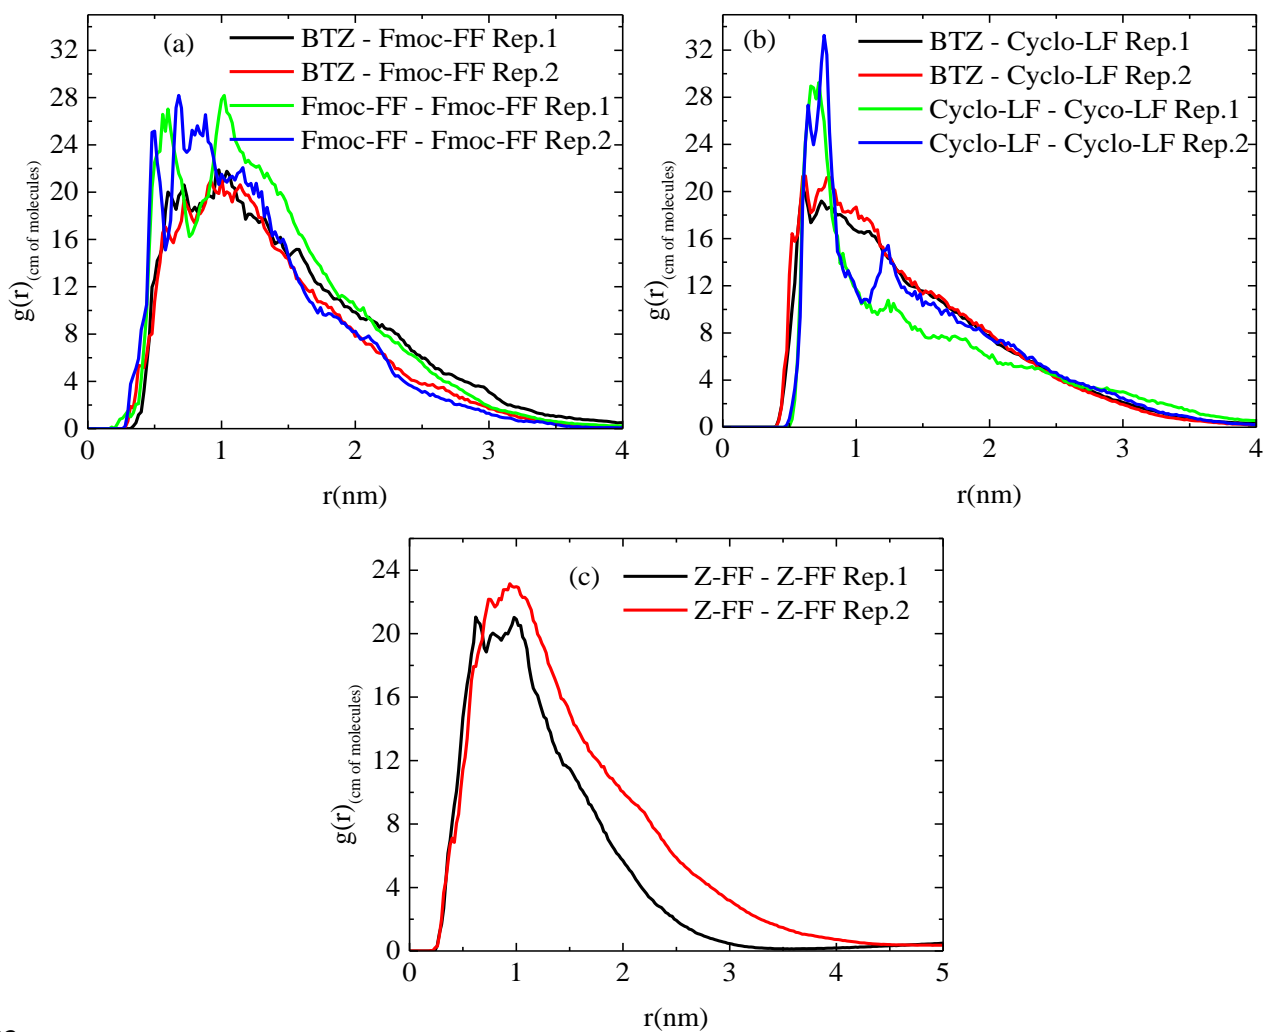

102

103

104 **Figure SI-6:** Pair radial distribution functions between dipeptide molecules and Bortezomib-  
 105 dipeptide molecules calculated for the cm of molecules in the aqueous solutions (a) Fmoc-FF with  
 106 BTZ; (b) Cyclo-LF with BTZ; (c) Z-FF bulk system.

107

108

109
